# Supplementary material for: Particulate air pollution and mortality in 38 of China’s largest cities: time series analysis
Source: PubMed Central journal article supplement — BMJ. 2017 Mar 14;356:j667. doi: 10.1136/bmj.j667 (PMC6287590; doi:10.1136/bmj.j667), 2017-03-14
Supplement: peny033574.ww.pdf [file peny033574.ww.pdf]

## Supplementary Materials to

### Particulate Air Pollution and Mortality in China: A Time-Series Analysis in the Largest 38 Chinese Cities

Authors:

Peng Yin<sup>a,\*</sup>, Guojun He<sup>b,\*</sup>, Maoyong Fan<sup>c,\*</sup>, Kowk Yan Chiu<sup>d</sup>, Maorong Fan<sup>e</sup>, Chang Liu<sup>f</sup>, An Xue<sup>g</sup>, Tong Liu<sup>d</sup>, Yuhang Pan<sup>d</sup>, Quan Mu<sup>h</sup>, Maigeng Zhou<sup>a,§</sup>

Affiliations:

<sup>a</sup> National Center for Chronic and Non-communicable Disease Control and Prevention, Chinese Center for Disease Control and Prevention, Beijing, China

<sup>b</sup> Division of Social Science, Division of Environment, and Economics Department, The Hong Kong University of Science and Technology, HK

<sup>c</sup> Department of Economics, Ball State University, Muncie, IN, USA

<sup>d</sup> The Hong Kong University of Science and Technology, HK

<sup>e</sup> Xiyuan Hospital, China Academy of Chinese Medical Sciences, Beijing, China

<sup>f</sup> Scheller College of Business, Georgia Institute of Technology, GA, USA

<sup>g</sup> Department of Environmental Engineering, Beijing University, Beijing, China

<sup>h</sup> The Nature Conservancy, Beijing, China

\* These authors contribute equally to this manuscript.

§ Corresponding author: Maigeng Zhou National Center for Chronic and Non-communicable Disease Control and Prevention, Chinese Center for Disease Control and Prevention, Nanwei Road, Xicheng District, Beijing, 100050, China; Email: [maigengzhou@126.com](mailto:maigengzhou@126.com).

## Supplementary Material 1: PM<sub>10</sub> calculation

The API is constructed based on the concentrations of 3 atmospheric pollutants, namely sulfur dioxide ( $SO_2$ ), nitrogen dioxide ( $NO_2$ ), and suspended particulates of 10 micrometers or less ( $PM_{10}$ ) measured at the monitoring stations throughout each city. It is a proxy measure of the ambient air quality. The API indicates the maximum concentration of the three pollutants. Table SM1 shows the relationship between the API and the concentration of the three air pollutants.

**Table SM1. The Relationship between the API and Air Pollutant Concentrations**

| API     | $SO_2$    | $NO_2$     | $PM_{10}$ | Air Quality Levels  |
|---------|-----------|------------|-----------|---------------------|
| 0-50    | 0-0.05    | 0-0.08     | 0-0.05    | Excellent           |
| 50-100  | 0.05-0.15 | 0.08-0.12  | 0.05-0.15 | Good                |
| 100-200 | 0.15-0.8  | 0.12-0.28  | 0.15-0.35 | Slightly Polluted   |
| 200-300 | 0.8-1.6   | 0.28-0.565 | 0.35-0.42 | Moderately Polluted |
| 300-400 | 1.6-2.1   | 0.565-0.75 | 0.42-0.5  | Severely Polluted   |
| 400-500 | 2.1-2.62  | 0.75-0.94  | 0.5-0.6   | Severely Polluted   |

Notes: Pollutant concentration is measured by  $mg/m^3$ . The last column is the official air quality description based on the API

The construction of the API takes four steps. First, measure the daily average concentration of each pollutant. Second, for each pollutant, find out its corresponding concentration interval in Table SM1. Third, calculate the pollution index (PI) of each pollutant linearly. Finally, take the maximum of all pollution indices and define it as the API.

For example, assume the concentrations of the three pollutants are:  $C_{SO_2} = 0.07mg/m^3$ ,  $C_{NO_2} = 0.10mg/m^3$ , and  $C_{PM_{10}} = 0.30mg/m^3$ , then use Table SM1 we find that the concentrations of  $SO_2$ , and  $NO_2$  are in the interval [50,100] while the  $PM_{10}$  concentration falls into the interval [100,200]. Within each interval we can calculate pollution index of each pollutant linearly:

$$PI_{SO_2} = \frac{100 - 50}{0.15 - 0.05} * (0.07 - 0.05) + 50 = 60$$

$$PI_{NO_2} = \frac{100 - 50}{0.12 - 0.08} * (0.10 - 0.08) + 50 = 75$$

$$PI_{PM_{10}} = \frac{200 - 100}{0.35 - 0.15} * (0.30 - 0.15) + 100 = 175$$

Then the  $API = \max\{PI_{SO_2}, PI_{NO_2}, PI_{PM_{10}}\} = 175$  and  $PM_{10}$  is called the primary pollutant. Reverse this process, we can recover the concentrations of the primary pollutant.

We use daily API to recover daily  $PM_{10}$  concentrations because the Chinese government did not provide daily individual pollution concentrations to the public. In our daily API data,  $PM_{10}$  is the primary pollutant for more than 90% of the days. So the reverse calculation can provide us accurate  $PM_{10}$  concentration data for 90% of the time. To deal with missing values in time series data, we use two different strategies to interpolate  $PM_{10}$  concentrations for the rest less than 10% sample: (1) treat those days as if  $PM_{10}$  is the primary pollutant, and (2) use linear interpolate for the missing values. We tried both methods and it turned out that both methods generated quantitatively similar empirical results. We also tried dropping the days with missing  $PM_{10}$  and re-estimated all the equations, and the results remained the

same. The main results reported in the paper used  $PM_{10}$  concentrations from method (1). The results using alternative  $PM_{10}$  measure or API are quantitatively similar and are available upon request.

## **Supplementary Material 2: Disease Surveillance Point System**

Daily mortality data come from the Disease Surveillance Point System (DSPS) of the Chinese Center for Disease Control and Prevention (CDC). The DSPS was established by the Chinese government to provide timely information on the causes and number of deaths in 1978. To represent national population and mortality trends, the DSPS adopted a multi-stage cluster population probability sampling method. The main objectives of the DSPS are to: (1) identify the number of deaths related to each disease category and provide basic mortality information about the deceased for public health officials; and (2) provide feedback to evaluate the impacts of the public health interventions. The DSPS initially covered 71 counties and city-districts in 29 provinces; this was expanded to 145 counties and city-districts in 31 provinces in 1990. The DSPS was overhauled following the Severe Acute Respiratory Syndrome (SARS) outbreak in 2003; 161 city districts and counties were in the system from 2004 to the present. Currently 81.5 million people, or roughly 6 percent of the Chinese population live in those DSPS city districts and counties.

In the event of a death, the doctor or decedent's family is required to fill out a death certificate and submit it to the DSPS. The mortality data include basic demographic characteristics of the decedent and the cause of death. The causes of death are coded in the International Classification of Diseases 10 (ICD-10). Total mortality is classified by causes of death: cardiovascular (I00-99) and respiratory (J00-99) diseases, and all other diseases. For this study, we had daily numbers of deaths by age group, gender, and cause of death for all the DSPS districts in the largest 38 cities. The data period is from Jan 1<sup>st</sup>, 2010 to June 29<sup>th</sup>, 2013. Table SM2 presents more details about the cities covered by the DSPS.

**Table SM2. Characteristics of DSPS Cities**

| City        | DSPS Districts     | City Area<br>(KM <sup>2</sup> ) | City Pop.<br>(1000) | District Pop. | Share of<br>Female<br>Population | Share of<br>the Elderly<br>(>60) | GDP Per<br>Capita<br>(10,000) | Share of<br>Construction<br>Workers |
|-------------|--------------------|---------------------------------|---------------------|---------------|----------------------------------|----------------------------------|-------------------------------|-------------------------------------|
| Anshan      | Qianshan           | 9254                            | 3512                | 211410        | 0.49                             | 0.15                             | 6.6                           | 0.08                                |
| Beijing     | Dongcheng,Tongzhou | 16411                           | 20166               | 1206066       | 0.49                             | 0.12                             | 7.1                           | 0.08                                |
| Changchun   | Nanguan            | 20604                           | 7592                | 550888        | 0.5                              | 0.12                             | 7.0                           | 0.04                                |
| Changde     | Wuling             | 18670                           | 5908                | 530319        | 0.5                              | 0.12                             | 5.4                           | 0.06                                |
| Changsha    | Tianxin            | 11816                           | 6920                | 472816        | 0.5                              | 0.13                             | 10.4                          | 0.07                                |
| Chengdu     | Qingyang           | 12125                           | 13247               | 823355        | 0.5                              | 0.15                             | 4.2                           | 0.05                                |
| Chongqing   | Dazu               | 82677                           | 29162               | 704640        | 0.49                             | 0.18                             | 2.6                           | 0.02                                |
| Guangzhou   | Yuexiu             | 7323                            | 12767               | 1163069       | 0.5                              | 0.15                             | 14.6                          | 0.04                                |
| Guilin      | Xiufeng            | 27809                           | 5145                | 155925        | 0.5                              | 0.13                             | 4.6                           | 0.01                                |
| Hangzhou    | Xiacheng           | 16588                           | 8748                | 506795        | 0.49                             | 0.16                             | 11.1                          | 0.02                                |
| Harbin      | Nangang            | 53068                           | 9929                | 1313002       | 0.49                             | 0.13                             | 5.2                           | 0.03                                |
| Hohhot      | Huimin             | 17292                           | 2719                | 394146        | 0.5                              | 0.11                             | 10.9                          | 0.05                                |
| Liuzhou     | Liubei             | 18617                           | 3677                | 425676        | 0.49                             | 0.14                             | 8.8                           | 0.03                                |
| Maanshan    | Yushan             | 3259                            | 1921                | 295972        | 0.48                             | 0.15                             | 7.9                           | 0.18                                |
| Nanchang    | Donghu             | 7402                            | 5081                | 575977        | 0.5                              | 0.14                             | 7.2                           | 0.02                                |
| Nanjing     | Pukou              | 6587                            | 7531                | 719366        | 0.48                             | 0.13                             | 9.1                           | 0.04                                |
| Panzhuhua   | Renhe              | 7427                            | 1188                | 261717        | 0.48                             | 0.15                             | 6.1                           | 0.01                                |
| Qingdao     | Shibei             | 11079                           | 8056                | 512573        | 0.5                              | 0.12                             | 10.3                          | 0.04                                |
| Qinhuangdao | Haigang            | 7709                            | 2970                | 610139        | 0.5                              | 0.13                             | 6.0                           | 0.04                                |
| Qiqihar     | Meilisi            | 42469                           | 5648                | 165790        | 0.49                             | 0.13                             | 3.3                           | 0.01                                |
| Shanghai    | Luwan              | 6340                            | 23435               | 1553413       | 0.48                             | 0.09                             | 11.9                          | 0.06                                |
| Shenyang    | Shenbei            | 12980                           | 7224                | 347655        | 0.49                             | 0.15                             | 8.0                           | 0.04                                |

|           |               |       |       |         |      |      |      |      |
|-----------|---------------|-------|-------|---------|------|------|------|------|
| Suzhou    | Wuzhong       | 8488  | 9148  | 1165065 | 0.49 | 0.11 | 14.5 | 0.11 |
| Taiyuan   | Xinghualingqu | 6972  | 4049  | 650546  | 0.5  | 0.14 | 5.8  | 0.04 |
| Tangshan  | Kaiping       | 13472 | 7549  | 270456  | 0.48 | 0.15 | 7.1  | 0.05 |
| Tianjin   | Hongqiao      | 11865 | 13557 | 550101  | 0.48 | 0.19 | 11.2 | 0.12 |
| Tongchuan | WangYi        | 3882  | 838   | 200762  | 0.5  | 0.17 | 2.5  | 0.10 |
| Urumqi    | Tianshan      | 13788 | 2501  | 711443  | 0.5  | 0.12 | 6.3  | 0.02 |
| Wuhan     | Jiang'an      | 8494  | 9502  | 902296  | 0.5  | 0.15 | 9.5  | 0.05 |
| Xining    | Chengzhong    | 7662  | 2218  | 298421  | 0.5  | 0.13 | 4.8  | 0.05 |
| Xuzhou    | Yunlong       | 11259 | 8955  | 320533  | 0.5  | 0.14 | 6.1  | 0.04 |
| Yantai    | Zhifu         | 13746 | 6671  | 828652  | 0.5  | 0.13 | 10.2 | 0.04 |
| Yichang   | Wujiagang     | 21084 | 4047  | 213884  | 0.49 | 0.14 | 7.2  | 0.05 |
| Yinchuan  | Xingqing      | 8975  | 2026  | 679976  | 0.47 | 0.06 | 5.4  | 0.04 |
| Yuxi      | Hongta        | 15285 | 2318  | 494672  | 0.49 | 0.13 | 10.7 | 0.06 |
| Zaozhuang | Xuecheng      | 4563  | 3875  | 391613  | 0.48 | 0.14 | 3.1  | 0.06 |
| Zhengzhou | Zhongyuan     | 7446  | 8849  | 620825  | 0.49 | 0.11 | 4.1  | 0.05 |
| Zunyi     | Qianshan      | 30762 | 6117  | 627764  | 0.49 | 0.11 | 3.5  | 0.03 |

Notes: Data are collected from city statistical yearbooks and 2005 small census.

**Table SM3. Coefficients of Figures 3, 4 and 5 in the Main Text**

| City        | All Causes<br>(1)       | Cardiorespiratory<br>(2) | Non-Cardiorespiratory<br>(3) |
|-------------|-------------------------|--------------------------|------------------------------|
| Yuxi        | 1.80<br>(0.60 to 3.00)  | 0.93<br>(-0.71 to 2.57)  | 2.72<br>(1.09 to 4.35)       |
| Maanshan    | 1.72<br>(0.72 to 2.72)  | 2.38<br>(0.85 to 3.91)   | 1.17<br>(-0.16 to 2.50)      |
| Liuzhou     | 1.69<br>(0.88 to 2.50)  | 2.35<br>(1.13 to 3.57)   | 1.20<br>(0.12 to 2.28)       |
| Guangzhou   | 1.65<br>(1.17 to 2.13)  | 2.07<br>(1.39 to 2.75)   | 1.26<br>(0.62 to 1.90)       |
| Zaozhuang   | 1.09<br>(0.36 to 1.82)  | 1.52<br>(0.59 to 2.45)   | 0.64<br>(-0.30 to 1.59)      |
| Wuhan       | 0.77<br>(0.40 to 1.15)  | 1.09<br>(0.58 to 1.60)   | 0.40<br>(-0.13 to 0.94)      |
| Taiyuan     | 0.76<br>(0.24 to 1.29)  | 1.05<br>(0.30 to 1.80)   | 0.48<br>(-0.21 to 1.18)      |
| Changde     | 0.71<br>(0.10 to 1.32)  | 0.70<br>(-0.18 to 1.58)  | 0.72<br>(-0.06 to 1.49)      |
| Changchun   | 0.64<br>(0.14 to 1.14)  | 0.20<br>(-0.49 to 0.90)  | 1.16<br>(0.43 to 1.89)       |
| Nanjing     | 0.59<br>(0.16 to 1.02)  | 1.10<br>(0.53 to 1.67)   | -0.06<br>(-0.68 to 0.57)     |
| Shenyang    | 0.58<br>(0.03 to 1.13)  | 0.68<br>(-0.01 to 1.38)  | 0.43<br>(-0.44 to 1.31)      |
| Tianjin     | 0.54<br>(0.19 to 0.90)  | 0.53<br>(0.09 to 0.97)   | 0.57<br>(0.03 to 1.11)       |
| Changsha    | 0.54<br>(-0.05 to 1.13) | 1.38<br>(0.58 to 2.18)   | -0.39<br>(-1.25 to 0.48)     |
| Hangzhou    | 0.50<br>(-0.09 to 1.09) | 0.50<br>(-0.38 to 1.39)  | 0.50<br>(-0.24 to 1.24)      |
| Chongqing   | 0.48<br>(0.19 to 0.78)  | 0.62<br>(0.23 to 1.02)   | 0.32<br>(-0.12 to 0.75)      |
| Yichang     | 0.47<br>(-0.60 to 1.54) | 1.08<br>(-0.35 to 2.51)  | -0.20<br>(-1.77 to 1.37)     |
| Zunyi       | 0.45<br>(-0.46 to 1.37) | 0.35<br>(-0.83 to 1.53)  | 0.58<br>(-0.77 to 1.94)      |
| Suzhou      | 0.44<br>(-0.00 to 0.89) | 1.02<br>(0.37 to 1.67)   | -0.12<br>(-0.73 to 0.50)     |
| Guilin      | 0.42<br>(-0.76 to 1.60) | 1.98<br>(0.32 to 3.64)   | -1.03<br>(-2.64 to 0.58)     |
| Qinhuangdao | 0.37                    | 0.19                     | 0.53                         |

|           |                 |                 |                 |
|-----------|-----------------|-----------------|-----------------|
|           | (-0.49 to 1.22) | (-0.97 to 1.36) | (-0.64 to 1.70) |
| Shanghai  | 0.31            | 0.28            | 0.35            |
|           | (0.00 to 0.61)  | (-0.14 to 0.69) | (-0.10 to 0.79) |
| Chengdu   | 0.29            | 0.38            | 0.23            |
|           | (-0.20 to 0.79) | (-0.31 to 1.07) | (-0.32 to 0.77) |
| Beijing   | 0.29            | 0.54            | -0.03           |
|           | (0.10 to 0.48)  | (0.28 to 0.80)  | (-0.31 to 0.25) |
| Yantai    | 0.25            | 0.90            | -0.40           |
|           | (-0.30 to 0.81) | (0.12 to 1.69)  | (-1.18 to 0.37) |
| Nanchang  | 0.22            | 0.51            | -0.07           |
|           | (-0.50 to 0.94) | (-0.47 to 1.49) | (-1.05 to 0.91) |
| Zhengzhou | 0.21            | 0.70            | -0.27           |
|           | (-0.26 to 0.67) | (0.04 to 1.35)  | (-0.92 to 0.39) |
| Qingdao   | 0.20            | 0.21            | 0.19            |
|           | (-0.11 to 0.50) | (-0.21 to 0.63) | (-0.25 to 0.63) |
| Tongchuan | 0.20            | 1.52            | -1.48           |
|           | (-1.07 to 1.46) | (-0.15 to 3.19) | (-3.31 to 0.35) |
| Hohhot    | 0.17            | -0.01           | 0.36            |
|           | (-0.72 to 1.05) | (-1.14 to 1.13) | (-0.86 to 1.58) |
| Anshan    | 0.12            | 0.31            | -0.11           |
|           | (-0.53 to 0.77) | (-0.57 to 1.19) | (-1.10 to 0.87) |
| Harbin    | 0.10            | 0.02            | 0.19            |
|           | (-0.28 to 0.48) | (-0.48 to 0.52) | (-0.36 to 0.73) |
| Urumqi    | 0.03            | 0.02            | 0.04            |
|           | (-0.43 to 0.49) | (-0.60 to 0.65) | (-0.58 to 0.66) |
| Xining    | 0.02            | 0.06            | -0.02           |
|           | (-0.88 to 0.93) | (-1.20 to 1.32) | (-1.37 to 1.33) |
| Tangshan  | -0.16           | -0.34           | 0.21            |
|           | (-1.15 to 0.83) | (-1.56 to 0.87) | (-1.34 to 1.75) |
| Qiqihar   | -0.24           | -0.13           | -0.41           |
|           | (-1.21 to 0.73) | (-1.37 to 1.11) | (-1.92 to 1.10) |
| Yinchuan  | -0.43           | -0.23           | -0.64           |
|           | (-1.07 to 0.21) | (-1.11 to 0.66) | (-1.58 to 0.31) |
| Xuzhou    | -0.64           | -1.09           | -0.06           |
|           | (-1.49 to 0.21) | (-2.28 to 0.10) | (-1.28 to 1.16) |
| Panzhuhua | -0.98           | -1.65           | -0.25           |
|           | (-2.45 to 0.48) | (-3.61 to 0.31) | (-2.43 to 1.93) |

Notes: Maximum likelihood estimates of the city-specific mean PM<sub>10</sub> effects with different lags on total mortality in the largest 38 cities in China. The dependent variable is the percentage change in the number of daily all-cause deaths. P-values are in the parenthesis beneath the coefficients. Column (1) includes coefficients for Figure 2; Columns (2) includes coefficients for Figure 3; and Columns (4) includes coefficients for Figure 4.



**Table SM4. Coefficients of Figures SM1-SM7**

| City      | Lag Structure           |                          |                          |                          |                          |                          |                         |
|-----------|-------------------------|--------------------------|--------------------------|--------------------------|--------------------------|--------------------------|-------------------------|
|           | Lag=1<br>(1)            | Lag=2<br>(2)             | Lag=3<br>(3)             | Lag=4<br>(4)             | Lag=5<br>(5)             | Lag=6<br>(6)             | MA(0,1&2)<br>(7)        |
| Yuxi      | 1.32<br>(0.14 to 2.50)  | 1.26<br>(0.11 to 2.41)   | 1.13<br>(-0.02 to 2.28)  | 0.48<br>(-0.67 to 1.63)  | -0.12<br>(-1.27 to 1.03) | -0.25<br>(-1.41 to 0.90) | 2.1<br>(0.68 to 3.52)   |
| Maanshan  | 1.08<br>(0.08 to 2.08)  | 0.5<br>(-0.52 to 1.52)   | -0.11<br>(-1.14 to 0.91) | 0.52<br>(-0.49 to 1.53)  | -0.01<br>(-1.03 to 1.01) | -0.21<br>(-1.23 to 0.82) | 1.75<br>(0.45 to 3.05)  |
| Liuzhou   | 1.46<br>(0.66 to 2.26)  | 1.22<br>(0.42 to 2.02)   | 0.65<br>(-0.15 to 1.45)  | 0.66<br>(-0.14 to 1.47)  | 0.34<br>(-0.47 to 1.15)  | 0.04<br>(-0.77 to 0.86)  | 2.14<br>(1.16 to 3.12)  |
| Guangzhou | 1.07<br>(0.60 to 1.54)  | 0.68<br>(0.22 to 1.14)   | 0.44<br>(-0.03 to 0.90)  | 0.3<br>(-0.16 to 0.76)   | 0.41<br>(-0.05 to 0.87)  | 0.57<br>(0.11 to 1.03)   | 1.66<br>(1.08 to 2.24)  |
| Zaozhuang | 0.72<br>(-0.01 to 1.45) | 0.54<br>(-0.21 to 1.29)  | 0.44<br>(-0.31 to 1.18)  | 0.9<br>(0.15 to 1.64)    | 0.5<br>(-0.25 to 1.24)   | -0.36<br>(-1.12 to 0.40) | 1.33<br>(0.39 to 2.27)  |
| Wuhan     | 0.5<br>(0.14 to 0.86)   | -0.04<br>(-0.40 to 0.32) | 0.05<br>(-0.31 to 0.41)  | 0.05<br>(-0.31 to 0.42)  | 0.02<br>(-0.35 to 0.38)  | -0.13<br>(-0.50 to 0.24) | 0.59<br>(0.14 to 1.03)  |
| Taiyuan   | 0.21<br>(-0.31 to 0.73) | 0.27<br>(-0.26 to 0.79)  | 0.33<br>(-0.20 to 0.86)  | -0.28<br>(-0.82 to 0.26) | -0.44<br>(-0.98 to 0.10) | -0.28<br>(-0.83 to 0.26) | 0.66<br>(-0.02 to 1.34) |
| Changde   | 0.23<br>(-0.38 to 0.84) | 0.06<br>(-0.55 to 0.67)  | 0.02<br>(-0.59 to 0.63)  | 0.08<br>(-0.53 to 0.69)  | -0.27<br>(-0.88 to 0.34) | 0<br>(-0.62 to 0.61)     | 0.5<br>(-0.24 to 1.23)  |
| Changchun | 0.06<br>(-0.46 to 0.57) | 0.24<br>(-0.27 to 0.74)  | 0.25<br>(-0.26 to 0.75)  | 0.04<br>(-0.48 to 0.56)  | -0.38<br>(-0.90 to 0.15) | 0.03<br>(-0.49 to 0.54)  | 0.57<br>(-0.11 to 1.26) |
| Nanjing   | 0.47<br>(0.05 to 0.90)  | 0.32<br>(-0.11 to 0.74)  | 0.37<br>(-0.04 to 0.79)  | 0.16<br>(-0.26 to 0.57)  | 0.07<br>(-0.35 to 0.48)  | 0.12<br>(-0.30 to 0.53)  | 0.8<br>(0.26 to 1.34)   |
| Shenyang  | 0.58                    | 0.31                     | 0.07                     | 0.1                      | 0.18                     | -0.08                    | 0.74                    |

|             |                          |                          |                           |                           |                          |                          |                          |
|-------------|--------------------------|--------------------------|---------------------------|---------------------------|--------------------------|--------------------------|--------------------------|
| Tianjin     | (0.05 to 1.12)<br>0.37   | (-0.24 to 0.87)<br>-0.02 | (-0.49 to 0.63)<br>-0.17  | (-0.47 to 0.67)<br>-0.19  | (-0.38 to 0.75)<br>-0.06 | (-0.65 to 0.50)<br>0.09  | (0.03 to 1.45)<br>0.64   |
| Changsha    | (0.01 to 0.72)<br>0.63   | (-0.38 to 0.34)<br>0.15  | (-0.53 to 0.20)<br>-0.04  | (-0.56 to 0.18)<br>-0.06  | (-0.42 to 0.31)<br>-0.17 | (-0.28 to 0.45)<br>-0.01 | (0.13 to 1.14)<br>0.63   |
| Hangzhou    | (0.06 to 1.20)<br>0.17   | (-0.42 to 0.73)<br>0.5   | (-0.62 to 0.54)<br>1      | (-0.64 to 0.52)<br>0.48   | (-0.76 to 0.41)<br>0.1   | (-0.60 to 0.58)<br>0.03  | (-0.08 to 1.35)<br>0.6   |
| Chongqing   | (-0.41 to 0.76)<br>0.33  | (-0.08 to 1.07)<br>0.18  | (0.44 to 1.56)<br>0.1     | (-0.09 to 1.05)<br>0.18   | (-0.47 to 0.67)<br>0.19  | (-0.55 to 0.61)<br>0.13  | (-0.17 to 1.37)<br>0.45  |
| Yichang     | (0.03 to 0.62)<br>0.48   | (-0.11 to 0.48)<br>0.64  | (-0.19 to 0.39)<br>-0.12  | (-0.11 to 0.48)<br>-0.3   | (-0.11 to 0.49)<br>-0.1  | (-0.18 to 0.43)<br>0.53  | (0.12 to 0.78)<br>0.79   |
| Zunyi       | (-0.61 to 1.57)<br>0.61  | (-0.46 to 1.74)<br>0.64  | (-1.24 to 0.99)<br>0.4    | (-1.43 to 0.83)<br>0.16   | (-1.23 to 1.02)<br>0.07  | (-0.59 to 1.65)<br>-0.28 | (-0.55 to 2.13)<br>0.98  |
| Suzhou      | (-0.30 to 1.52)<br>0.33  | (-0.27 to 1.54)<br>0.3   | (-0.50 to 1.31)<br>0.31   | (-0.74 to 1.06)<br>0.13   | (-0.83 to 0.98)<br>0.22  | (-1.20 to 0.65)<br>0.14  | (-0.15 to 2.11)<br>0.62  |
| Guilin      | (-0.10 to 0.76)<br>0.49  | (-0.13 to 0.73)<br>0.08  | (-0.12 to 0.73)<br>-0.84  | (-0.29 to 0.56)<br>-1.28  | (-0.20 to 0.65)<br>-0.68 | (-0.29 to 0.56)<br>0.09  | (0.04 to 1.20)<br>0.5    |
| Qinhuangdao | (-0.68 to 1.65)<br>0     | (-1.09 to 1.24)<br>-0.49 | (-2.02 to 0.34)<br>0.05   | (-2.47 to -0.09)<br>-0.16 | (-1.84 to 0.49)<br>0.26  | (-1.06 to 1.24)<br>-0.37 | (-0.91 to 1.91)<br>-0.04 |
| Shanghai    | (-0.85 to 0.86)<br>0.19  | (-1.36 to 0.39)<br>0.1   | (-0.84 to 0.93)<br>0.13   | (-1.08 to 0.77)<br>0.25   | (-0.66 to 1.17)<br>0.38  | (-1.29 to 0.55)<br>0.27  | (-1.21 to 1.13)<br>0.36  |
| Chengdu     | (-0.10 to 0.49)<br>-0.19 | (-0.19 to 0.38)<br>-0.5  | (-0.16 to 0.42)<br>-0.72  | (-0.03 to 0.53)<br>-0.1   | (0.10 to 0.66)<br>-0.18  | (-0.01 to 0.56)<br>-0.47 | (-0.05 to 0.78)<br>-0.19 |
| Beijing     | (-0.69 to 0.31)<br>0.14  | (-1.00 to 0.00)<br>-0.03 | (-1.22 to -0.21)<br>-0.12 | (-0.60 to 0.40)<br>-0.12  | (-0.69 to 0.32)<br>-0.02 | (-0.98 to 0.05)<br>-0.11 | (-0.81 to 0.42)<br>0.25  |
| Yantai      | (-0.05 to 0.33)<br>0.19  | (-0.22 to 0.16)<br>0.17  | (-0.30 to 0.07)<br>-0.15  | (-0.31 to 0.07)<br>0.02   | (-0.21 to 0.17)<br>-0.1  | (-0.30 to 0.08)<br>0.12  | (-0.02 to 0.51)<br>0.37  |

|           |                          |                          |                          |                          |                          |                          |                          |
|-----------|--------------------------|--------------------------|--------------------------|--------------------------|--------------------------|--------------------------|--------------------------|
| Nanchang  | (-0.36 to 0.74)<br>0.14  | (-0.38 to 0.72)<br>0.2   | (-0.70 to 0.40)<br>-0.24 | (-0.53 to 0.57)<br>-0.22 | (-0.65 to 0.46)<br>-0.31 | (-0.43 to 0.67)<br>-0.31 | (-0.36 to 1.11)<br>0.29  |
| Zhengzhou | (-0.55 to 0.83)<br>0.11  | (-0.47 to 0.88)<br>-0.12 | (-0.91 to 0.43)<br>-0.18 | (-0.90 to 0.46)<br>0.04  | (-0.99 to 0.37)<br>0.16  | (-1.01 to 0.38)<br>-0.01 | (-0.60 to 1.17)<br>0.14  |
| Qingdao   | (-0.35 to 0.58)<br>0.06  | (-0.59 to 0.35)<br>0.2   | (-0.65 to 0.29)<br>0.25  | (-0.43 to 0.50)<br>0.2   | (-0.31 to 0.62)<br>0.13  | (-0.47 to 0.46)<br>0.2   | (-0.46 to 0.74)<br>0.2   |
| Tongchuan | (-0.24 to 0.36)<br>0.2   | (-0.10 to 0.50)<br>0     | (-0.05 to 0.55)<br>-0.04 | (-0.09 to 0.50)<br>0.3   | (-0.17 to 0.43)<br>-0.05 | (-0.10 to 0.49)<br>0.23  | (-0.19 to 0.58)<br>0.11  |
| Hohhot    | (-1.04 to 1.43)<br>0.11  | (-1.25 to 1.24)<br>-0.08 | (-1.28 to 1.21)<br>-0.49 | (-0.96 to 1.56)<br>0.02  | (-1.30 to 1.20)<br>0.16  | (-1.02 to 1.49)<br>0.73  | (-1.52 to 1.73)<br>-0.02 |
| Anshan    | (-0.76 to 0.99)<br>0.2   | (-0.96 to 0.79)<br>0.25  | (-1.37 to 0.39)<br>0.27  | (-0.85 to 0.90)<br>0     | (-0.71 to 1.02)<br>0.3   | (-0.11 to 1.57)<br>0.16  | (-1.19 to 1.15)<br>0.34  |
| Harbin    | (-0.45 to 0.84)<br>0.2   | (-0.40 to 0.89)<br>0.07  | (-0.38 to 0.91)<br>-0.06 | (-0.65 to 0.64)<br>0.25  | (-0.34 to 0.94)<br>0.04  | (-0.48 to 0.80)<br>-0.05 | (-0.52 to 1.19)<br>0.26  |
| Urumqi    | (-0.17 to 0.57)<br>-0.05 | (-0.31 to 0.44)<br>-0.17 | (-0.44 to 0.32)<br>0.22  | (-0.13 to 0.62)<br>0.13  | (-0.33 to 0.42)<br>0.27  | (-0.42 to 0.33)<br>0.25  | (-0.26 to 0.79)<br>-0.19 |
| Xining    | (-0.51 to 0.41)<br>-0.36 | (-0.64 to 0.29)<br>0.34  | (-0.24 to 0.68)<br>0.25  | (-0.33 to 0.59)<br>-0.74 | (-0.20 to 0.74)<br>-0.18 | (-0.23 to 0.72)<br>-0.01 | (-0.78 to 0.41)<br>-0.04 |
| Tangshan  | (-1.26 to 0.54)<br>-0.79 | (-0.53 to 1.20)<br>-0.55 | (-0.62 to 1.12)<br>0.58  | (-1.63 to 0.15)<br>1.04  | (-1.02 to 0.67)<br>1.37  | (-0.86 to 0.85)<br>1.75  | (-1.25 to 1.18)<br>-0.84 |
| Qiqihar   | (-1.74 to 0.16)<br>-0.21 | (-1.50 to 0.40)<br>-0.43 | (-0.37 to 1.53)<br>-0.57 | (0.07 to 2.01)<br>-0.26  | (0.39 to 2.35)<br>-0.65  | (0.78 to 2.72)<br>-0.59  | (-2.17 to 0.50)<br>-0.35 |
| Yinchuan  | (-1.20 to 0.77)<br>-0.36 | (-1.42 to 0.55)<br>-0.19 | (-1.57 to 0.42)<br>0.08  | (-1.25 to 0.73)<br>0.21  | (-1.64 to 0.35)<br>0     | (-1.58 to 0.41)<br>0.37  | (-1.56 to 0.85)<br>-0.53 |
| Xuzhou    | (-0.99 to 0.28)<br>-0.16 | (-0.82 to 0.43)<br>0.06  | (-0.53 to 0.69)<br>-0.19 | (-0.40 to 0.82)<br>0.09  | (-0.61 to 0.61)<br>0.19  | (-0.24 to 0.98)<br>-0.62 | (-1.38 to 0.33)<br>-0.6  |

|           |                 |                 |                 |                 |                 |                 |                 |
|-----------|-----------------|-----------------|-----------------|-----------------|-----------------|-----------------|-----------------|
|           | (-0.97 to 0.65) | (-0.74 to 0.87) | (-1.00 to 0.62) | (-0.71 to 0.89) | (-0.61 to 0.98) | (-1.44 to 0.21) | (-1.71 to 0.50) |
| Panzhihua | -0.37           | -1.13           | -0.22           | 0.14            | 0.58            | 0.3             | -1.39           |
|           | (-1.84 to 1.10) | (-2.60 to 0.34) | (-1.67 to 1.24) | (-1.31 to 1.59) | (-0.87 to 2.02) | (-1.15 to 1.75) | (-3.35 to 0.57) |

---

Notes: Maximum likelihood estimates of the city-specific mean PM<sub>10</sub> effects with different lags on total mortality in the largest 38 cities in China. The dependent variable is the percentage change in the number of daily all-cause deaths. P-values are in the parenthesis beneath the coefficients. Columns (1)-(7) include coefficients for Figures SM1-SM7, respectively.

**Table SM5. Relationships between Air Pollution Effect and City-specific Factors (excluding Urumqi)**

|                                                      | (1)            | (2)              | (3)              |
|------------------------------------------------------|----------------|------------------|------------------|
| Mean PM <sub>10</sub> (10 $\mu\text{g}/\text{m}^3$ ) | -0.15*         | -0.27**          | -0.31**          |
|                                                      | (-0.31 - 0.01) | (-0.54 - -0.002) | (-0.56 - -0.07)  |
| Mean PM <sub>10</sub> ×North                         |                | 0.29**           | 0.27*            |
|                                                      |                | (0.01 - 0.58)    | (-0.00 - 0.55)   |
| North (=1)                                           |                | -3.01**          | -2.78**          |
|                                                      |                | (-5.54 - -0.49)  | (-5.17 - -0.39)  |
| GDP Per Capita<br>(10,000 Yuan)                      |                |                  | -0.05            |
|                                                      |                |                  | (-0.16 - 0.06)   |
| Share of Workers in<br>Construction Industry (%)     |                |                  | 6.81**           |
|                                                      |                |                  | (1.26 - 12.37)   |
| Share of Females<br>(%)                              |                |                  | 5.30             |
|                                                      |                |                  | (-20.23 - 30.83) |
| Share of Old People<br>(Age>60, %)                   |                |                  | 6.28*            |
|                                                      |                |                  | (-0.02 - 12.58)  |
| Observations                                         | 37             | 37               | 37               |
| R-squared                                            | 0.09           | 0.28             | 0.48             |

Notes: We regress the estimated air pollution effects (PM<sub>10</sub> coefficients) in Figure 2 on mean PM<sub>10</sub> concentrations (in 10  $\mu\text{g}/\text{m}^3$ ), a north indicator, GDP per capita (10,000 Yuan), share of workers in construction industry, share of female population, share of old population. GDP per capita is collected from city statistical yearbooks. Urumqi is excluded from the sample. Demographic variables are from 2005 micro census data. 95% confidence intervals are in parenthesis. \*, \*\*, and \*\*\* indicate statistical significance at 10%, 5%, and 1% respectively.

**Figure SM1. Percentage Change in Daily Number of All-Cause Deaths per 10- $\mu\text{g}/\text{m}^3$  Increase in PM<sub>10</sub> in 38 Chinese Cities (Lag 1 Day)**

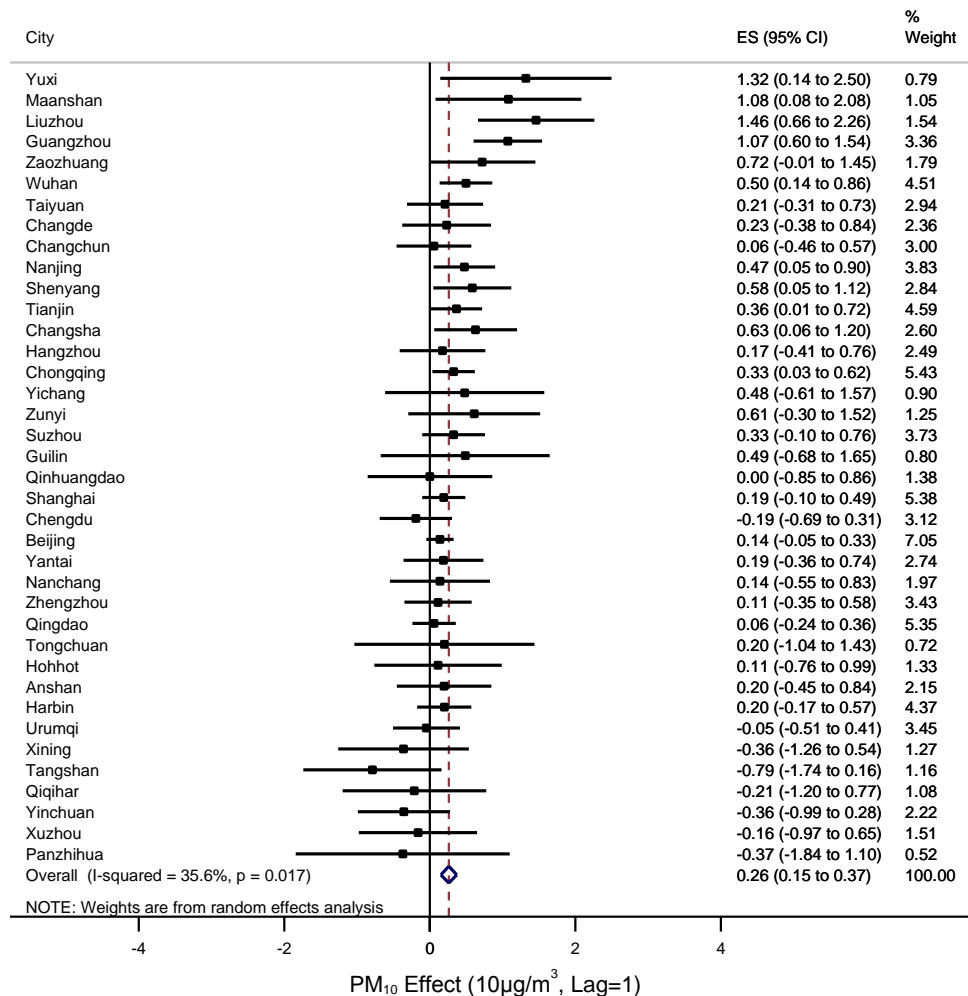

Notes: Maximum likelihood estimates and 95 percent confidence intervals of the city-specific mean PM<sub>10</sub> effects on total mortality in the largest 38 cities in China. The dependent variable is the percentage change in the number of daily all-cause deaths. X-axis is percentage change. Each solid square represents an effect size. Horizontal lines indicate 95 percent CIs. ES=Effect Size.

**Figure SM2. Percentage Change in Daily Number of All-Cause Deaths per 10- $\mu\text{g}/\text{m}^3$  Increase in  $\text{PM}_{10}$  in 38 Chinese Cities (Lag 2 Days)**

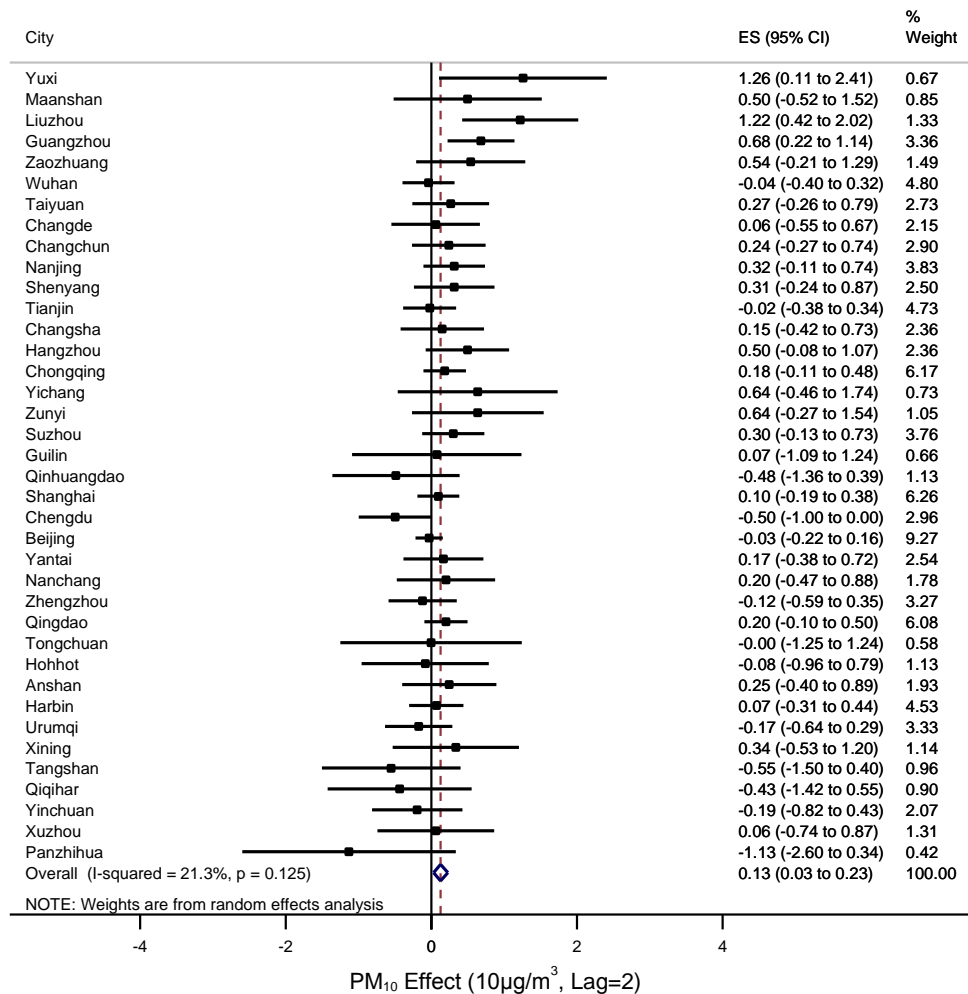

Notes: Maximum likelihood estimates and 95 percent confidence intervals of the city-specific mean  $\text{PM}_{10}$  effects on total mortality in the largest 38 cities in China. The dependent variable is the percentage change in the number of daily all-cause deaths. X-axis is percentage change. Each solid square represents an effect size. Horizontal lines indicate 95 percent CIs. ES=Effect Size.

**Figure SM3. Percentage Change in Daily Number of All-Cause Deaths per 10- $\mu\text{g}/\text{m}^3$  Increase in PM<sub>10</sub> in 38 Chinese Cities (Lag 3 Days)**

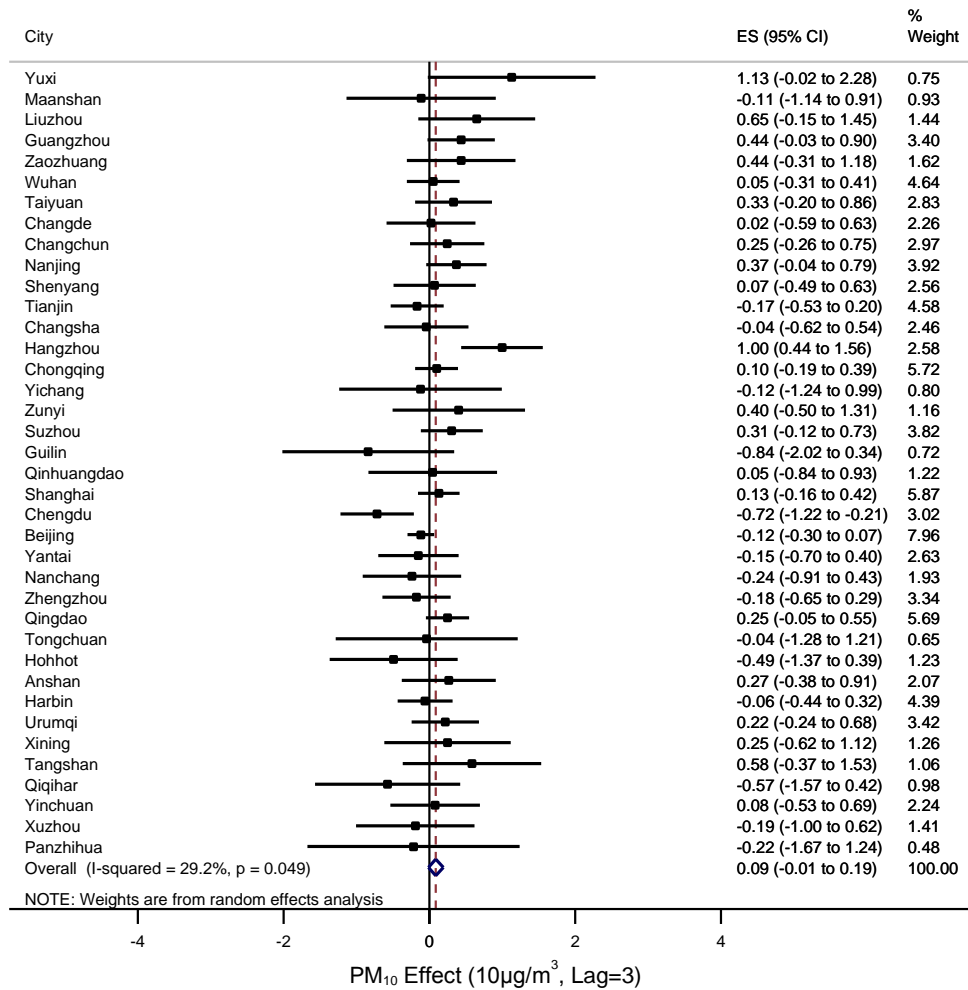

Notes: Maximum likelihood estimates and 95 percent confidence intervals of the city-specific mean PM<sub>10</sub> effects on total mortality in the largest 38 cities in China. The dependent variable is the percentage change in the number of daily all-cause deaths. X-axis is percentage change. Each solid square represents an effect size. Horizontal lines indicate 95 percent CIs. ES=Effect Size.



**Figure SM4. Percentage Change in Daily Number of All-Cause Deaths per 10- $\mu\text{g}/\text{m}^3$  Increase in  $\text{PM}_{10}$  in 38 Chinese Cities (Lag 4 Days)**

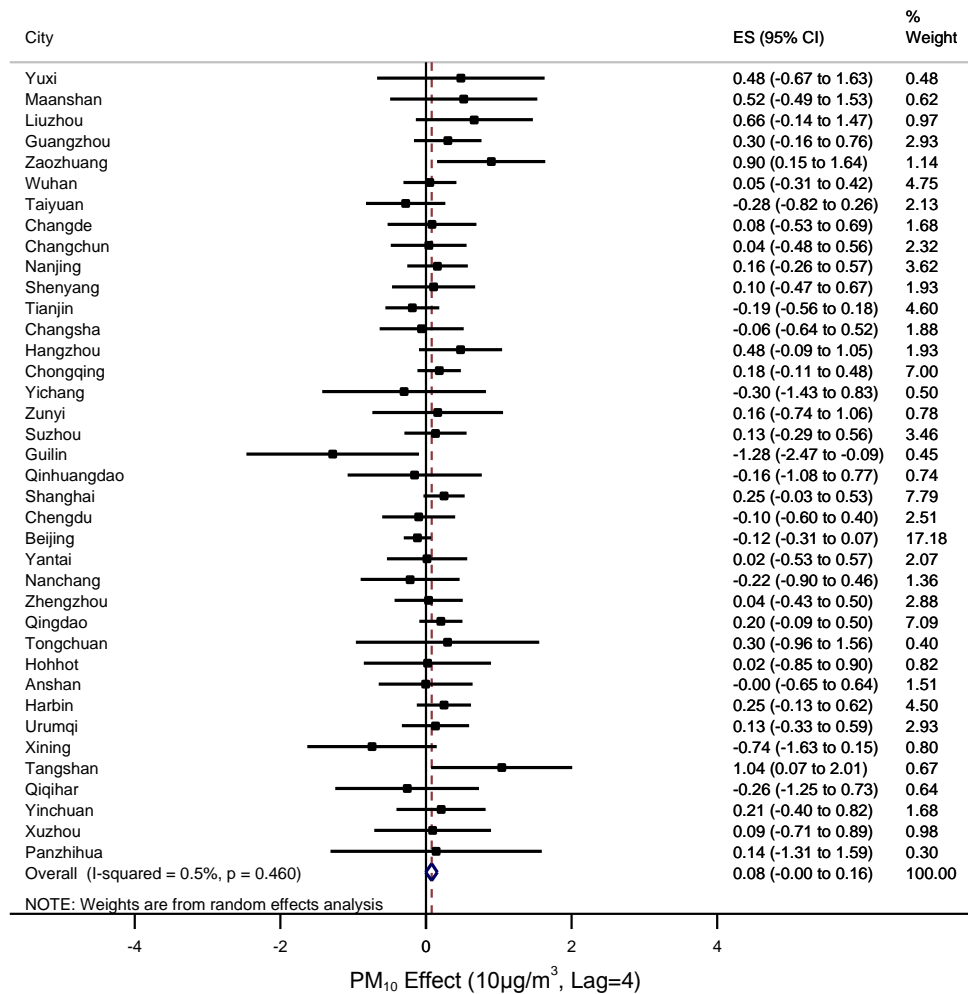

Notes: Maximum likelihood estimates and 95 percent confidence intervals of the city-specific mean  $\text{PM}_{10}$  effects on total mortality in the largest 38 cities in China. The dependent variable is the percentage change in the number of daily all-cause deaths. X-axis is percentage change. Each solid square represents an effect size. Horizontal lines indicate 95 percent CIs. ES=Effect Size.

**Figure SM5. Percentage Change in Daily Number of All-Cause Deaths per 10- $\mu\text{g}/\text{m}^3$  Increase in PM<sub>10</sub> in 38 Chinese Cities (Lag 5 Days)**

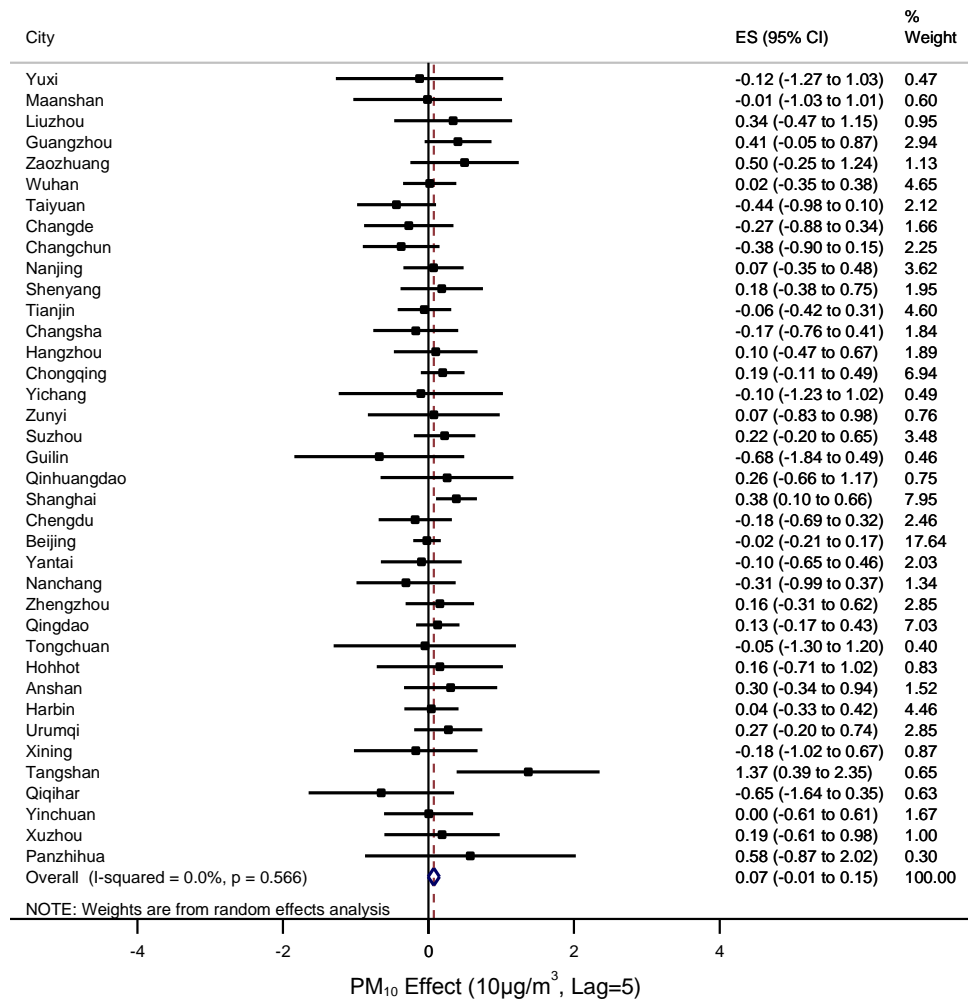

Notes: Maximum likelihood estimates and 95 percent confidence intervals of the city-specific mean PM<sub>10</sub> effects on total mortality in the largest 38 cities in China. The dependent variable is the percentage change in the number of daily all-cause deaths. X-axis is percentage change. Each solid square represents an effect size. Horizontal lines indicate 95 percent CIs. ES=Effect Size.

**Figure SM6. Percentage Change in Daily Number of All-Cause Deaths per 10- $\mu\text{g}/\text{m}^3$  Increase in  $\text{PM}_{10}$  in 38 Chinese Cities (Lag 6 Days)**

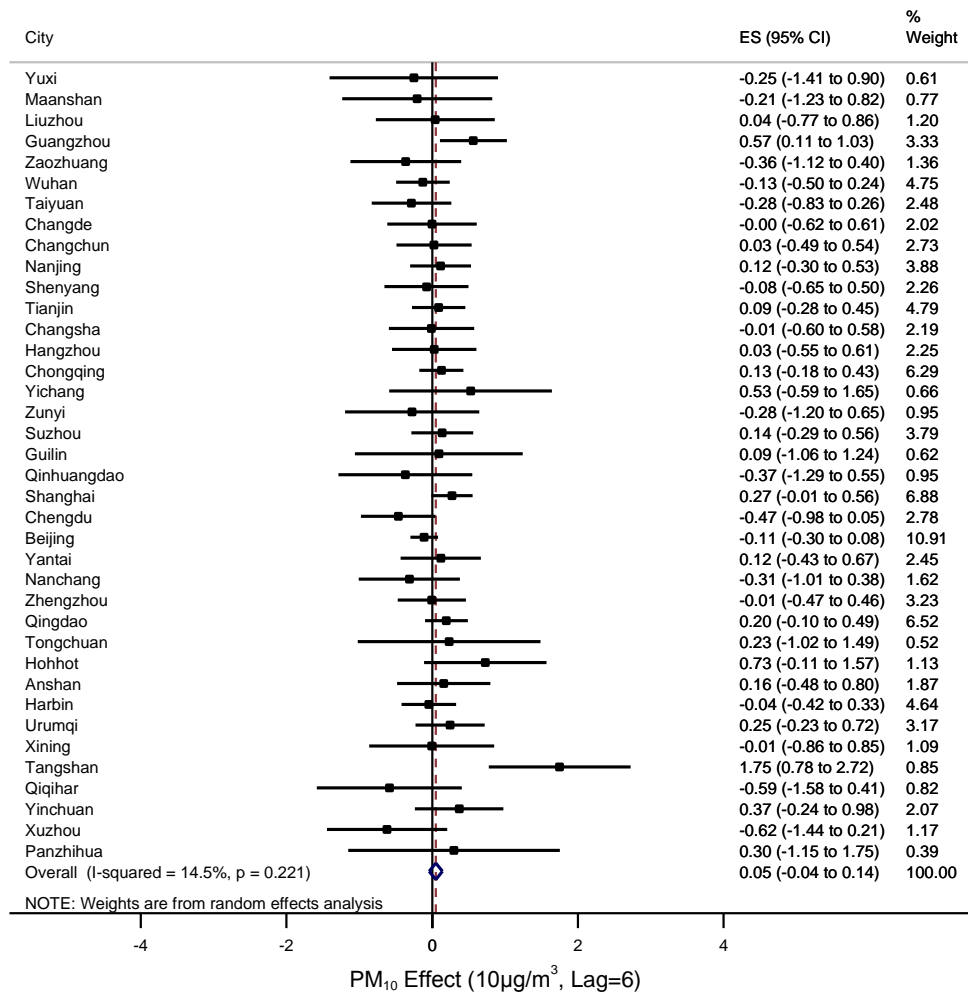

Notes: Maximum likelihood estimates and 95 percent confidence intervals of the city-specific mean  $\text{PM}_{10}$  effects on total mortality in the largest 38 cities in China. The dependent variable is the percentage change in the number of daily all-cause deaths. X-axis is percentage change. Each solid square represents an effect size. Horizontal lines indicate 95 percent CIs. ES=Effect Size.

**Figure SM7. Percentage Change in Daily Number of All-Cause Deaths per 10- $\mu\text{g}/\text{m}^3$  Increase in 3-day Moving Average PM<sub>10</sub> (lags 0, 1, and 2) in 38 Chinese Cities**

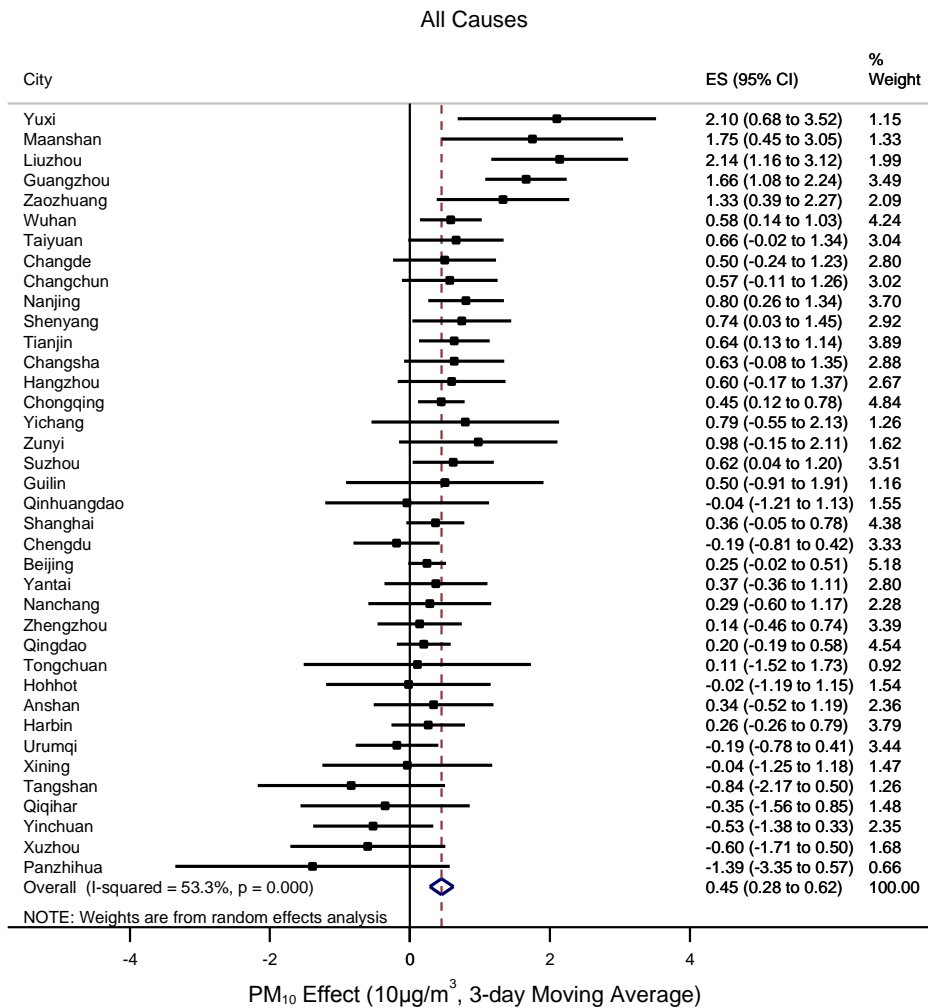

Notes: Maximum likelihood estimates and 95 percent confidence intervals of the city-specific mean lag PM<sub>10</sub> effects on total mortality in the largest 38 cities in China. The dependent variable is the percentage change in the number of daily all-cause deaths. X-axis is percentage change. Each solid square represents an effect size. Horizontal lines indicate 95 percent CIs. ES=Effect Size.

**Figure SM8 Percentage Change in Daily Number of Deaths per  $10\text{-}\mu\text{g}/\text{m}^3$  Increase in Concurrent Day  $\text{PM}_{10}$  in 38 Chinese Cities: Males vs. Females**

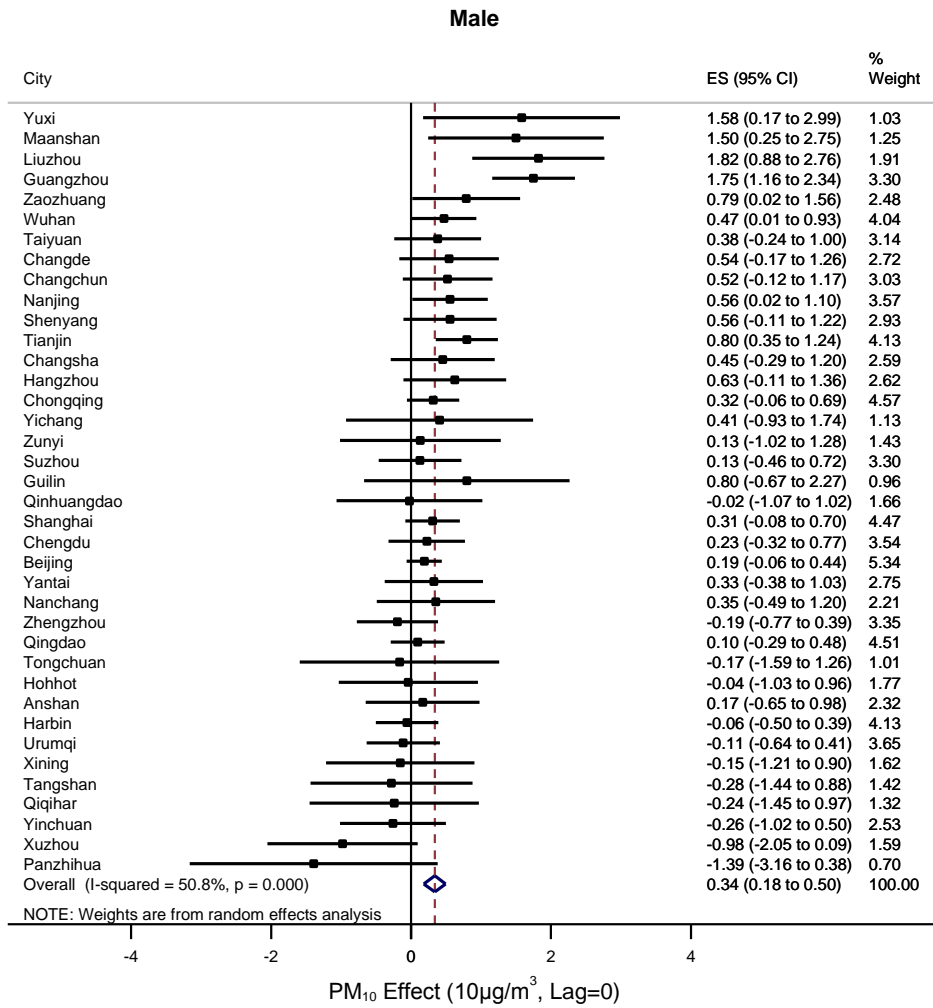

Female

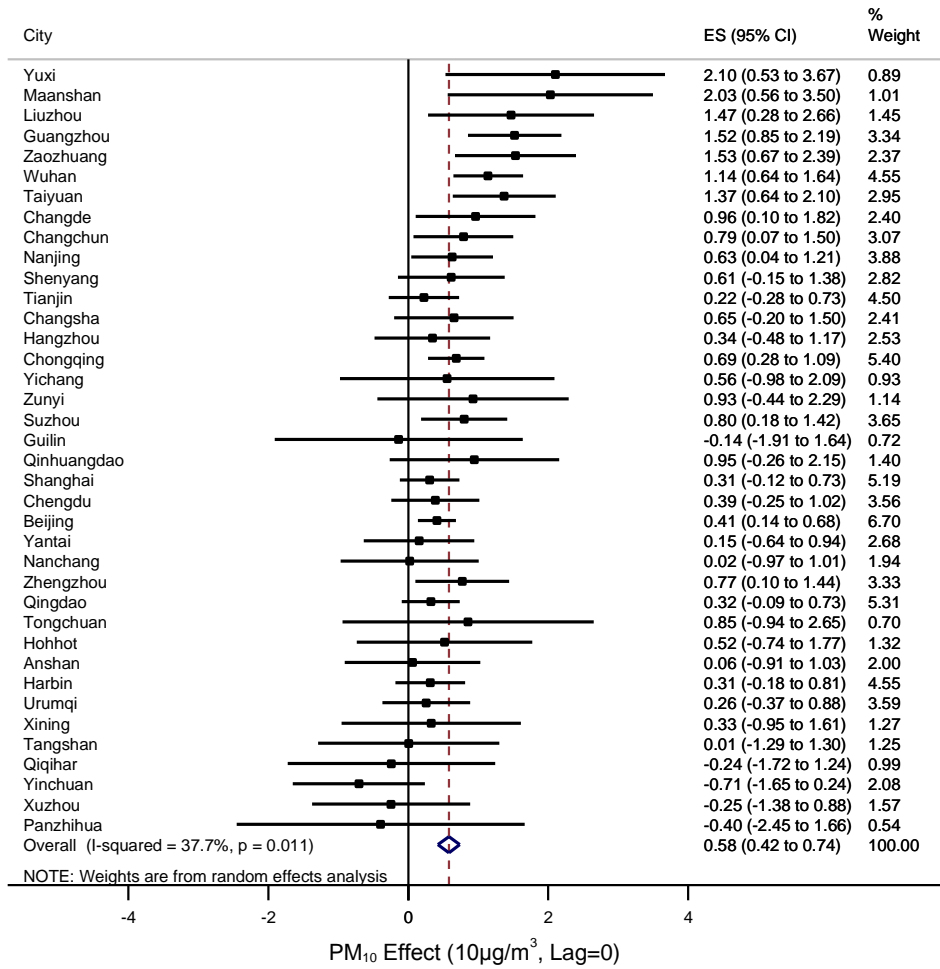

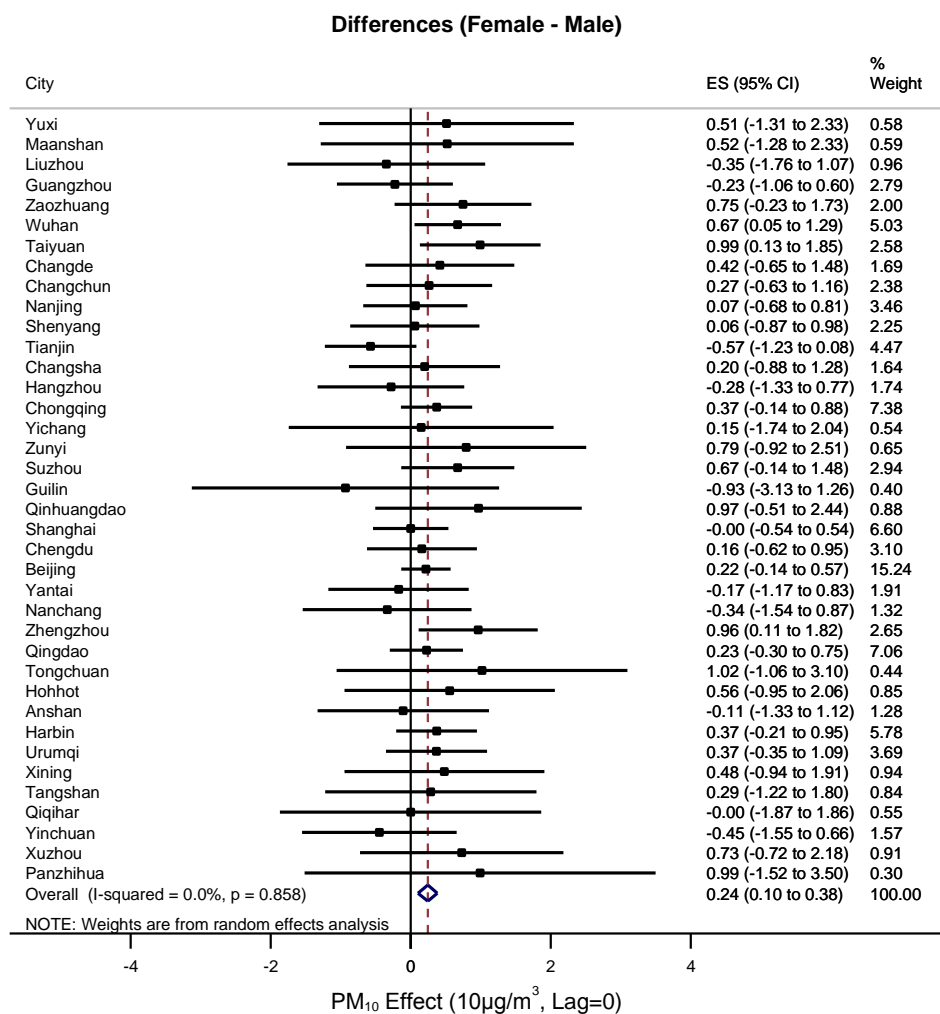

Notes: Maximum likelihood estimates and 95 percent confidence intervals of the city-specific mean lag PM<sub>10</sub> effects on total mortality for male and female deaths and their differences in the largest 38 cities in China. Each solid square represents an effect size. Horizontal lines indicate 95% CIs. ES=Effect Size.

**Figure SM9. Percentage Change in Daily Number of Deaths per 10-  $\mu\text{g}/\text{m}^3$  Increase in Concurrent Day  $\text{PM}_{10}$  in 38 Chinese Cities: Old vs. Young**

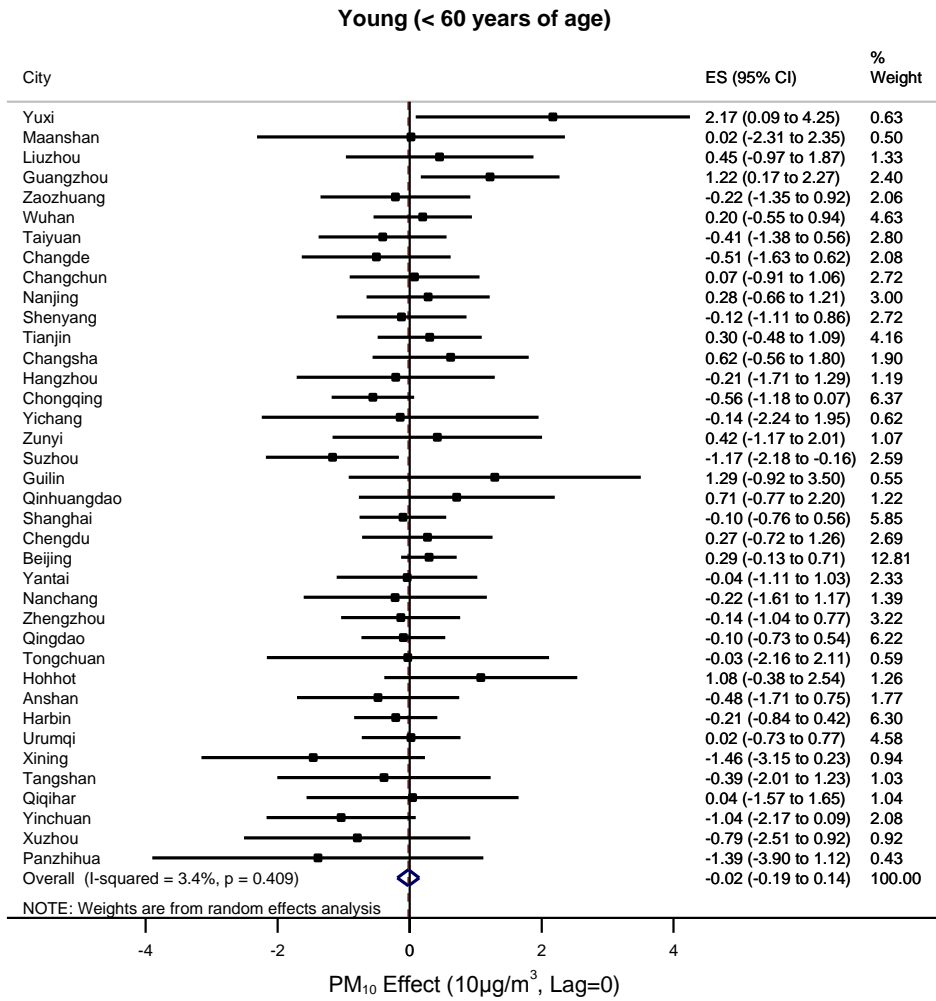



Old (>= 60 years of age)

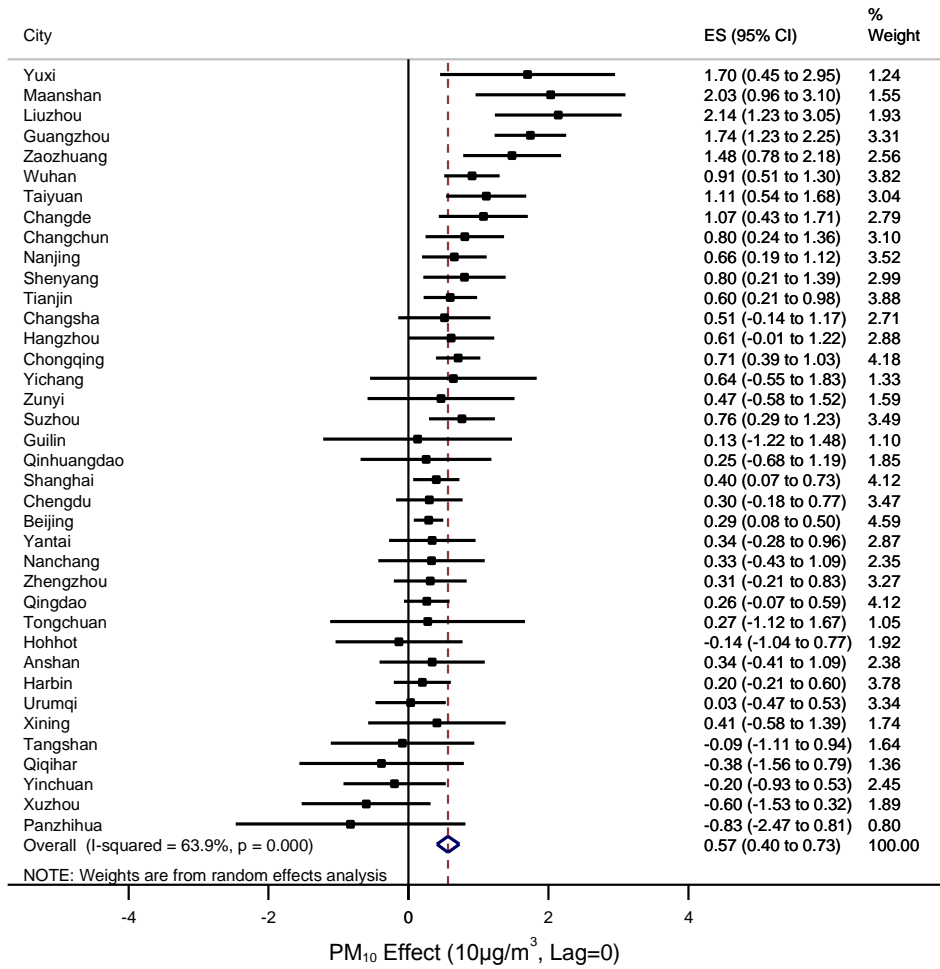

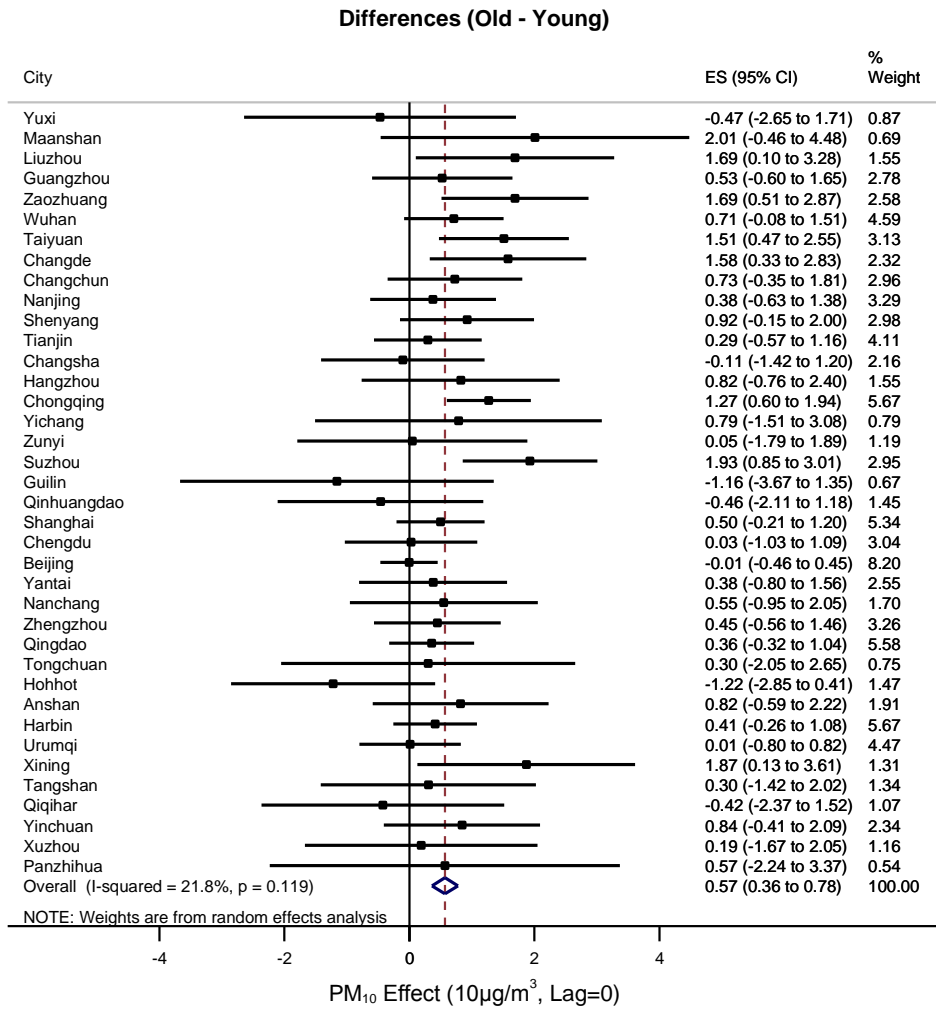

Notes: Maximum likelihood estimates and 95 percent confidence intervals of the city-specific mean lag PM<sub>10</sub> effects on total mortality for young and old deaths and their differences in the largest 38 cities in China. Each solid square represents an effect size. Horizontal lines indicate 95% CIs. ES=Effect Size.

**Figure SM10. City-Specific Air Pollution Estimates and Average PM<sub>10</sub> Concentrations**

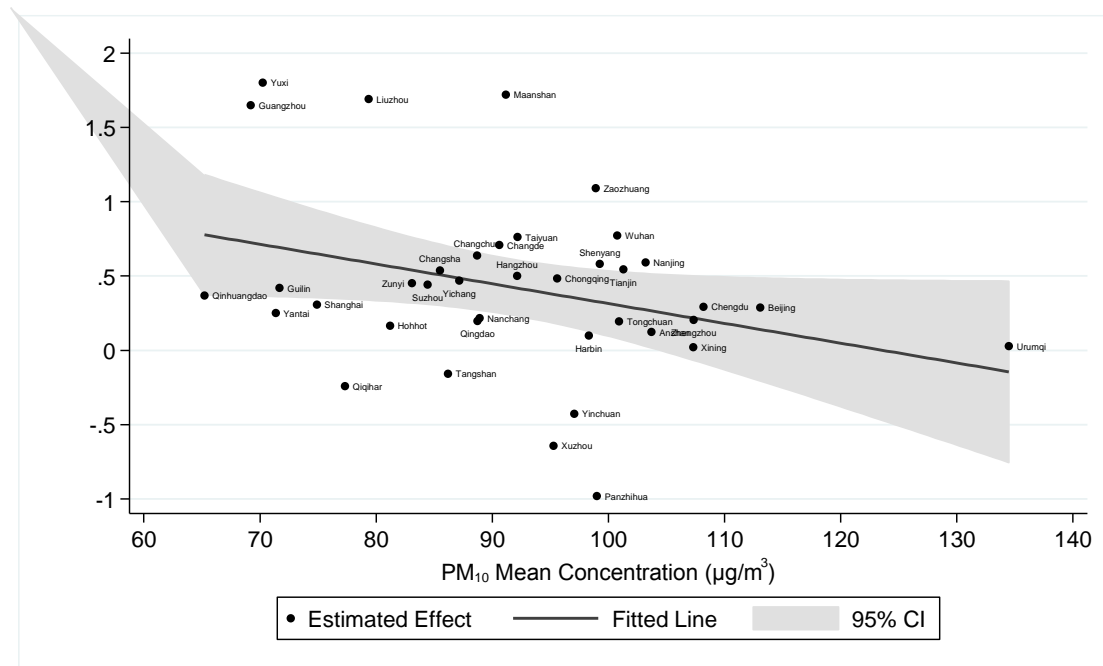

Notes: The figure plots estimated air pollution effect (percentage change in daily number of all-cause deaths per 10-  $\mu\text{g}/\text{m}^3$  Increase in Concurrent Day PM<sub>10</sub>, coefficients in Figure 2) against the mean PM<sub>10</sub> concentrations. The solid line is a linear regression.

**Figure SM11. City-Specific Air Pollution Estimates and Average PM<sub>10</sub> Concentrations: North vs. South**

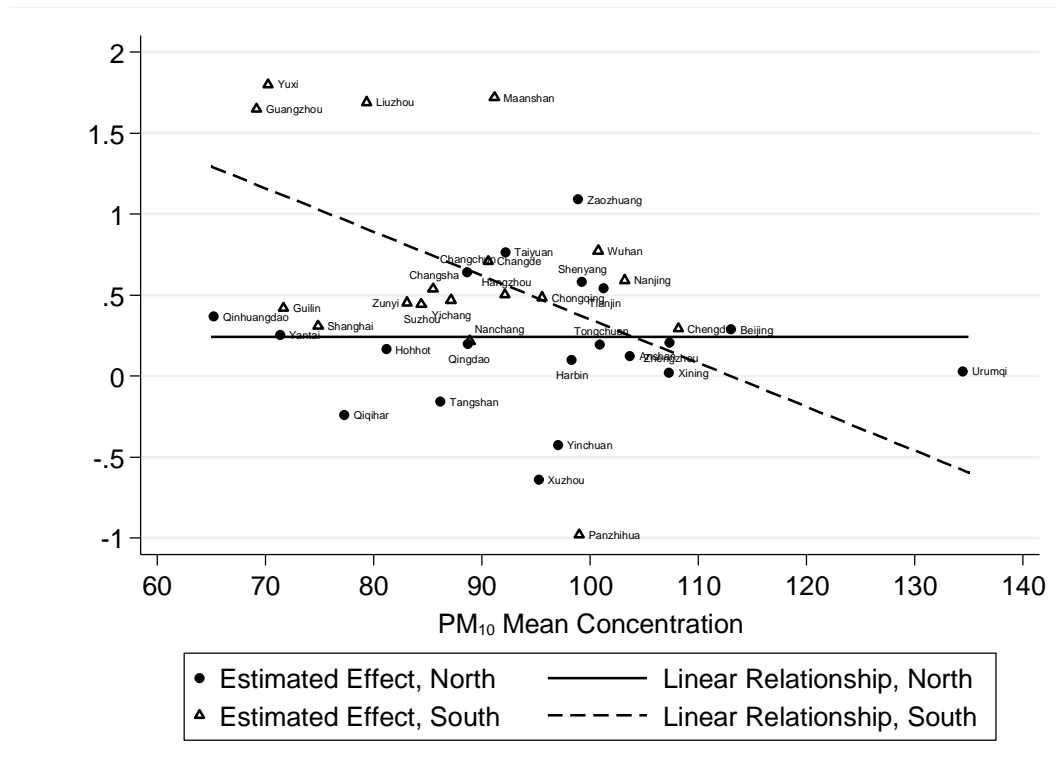

Notes: The figure plots estimated air pollution effect (percentage change in daily number of all-cause deaths per 10-  $\mu\text{g}/\text{m}^3$  Increase in Concurrent Day PM<sub>10</sub>, coefficients in Figure 2). The solid dots are northern cities. The hollow triangles are southern cities. The solid line represents a linear relationship for northern cities. The dashed line is for southern cities. The regression lines are corresponding to coefficients in column (2) of Table 3.

**Figure SM12. Socio-economic Factors and Marginal Pollution Effects**

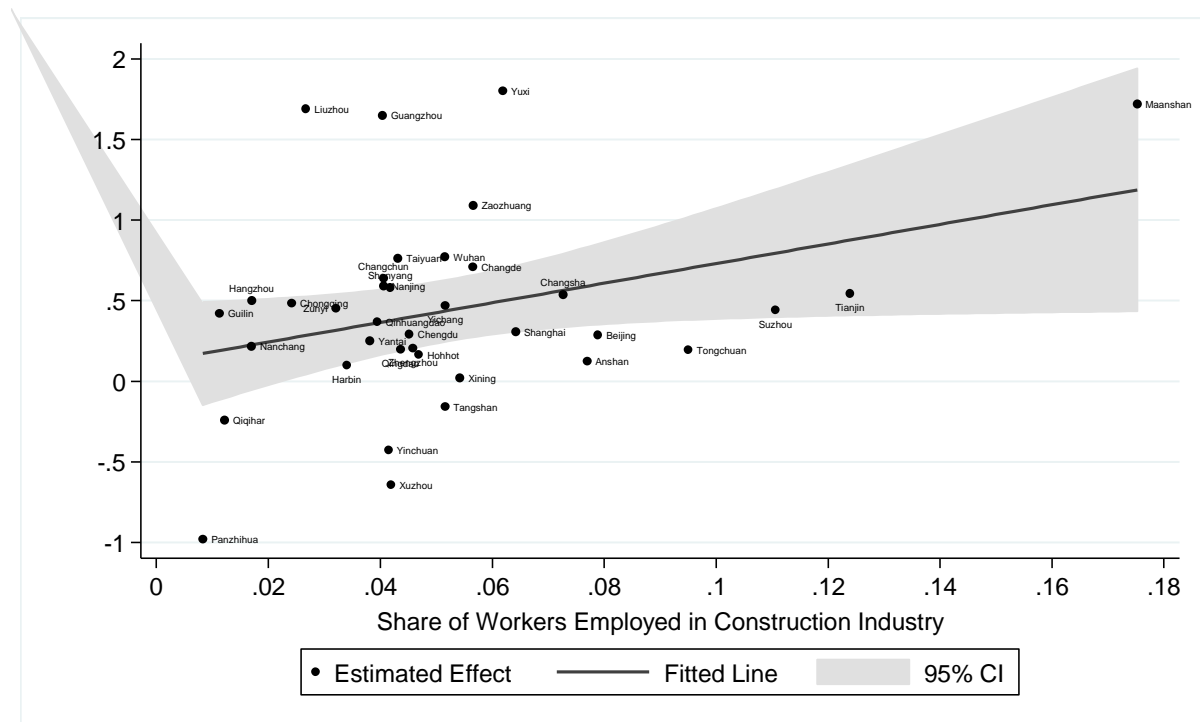

Notes: The figure plots estimated air pollution effect (percentage change in daily number of all-cause deaths per 10-  $\mu\text{g}/\text{m}^3$  increase in Concurrent Day  $\text{PM}_{10}$ , coefficients in Figure 2) against the share of workers employed in construction industry. The solid line is a linear regression.
