# Supplementary figures and images for: Particulate air pollution and mortality in 38 of China’s largest cities: time series analysis
Source: PubMed Central journal article supplement — BMJ. 2017 Mar 14;356:j667. doi: 10.1136/bmj.j667 (PMC6287590; doi:10.1136/bmj.j667), 2017-03-14

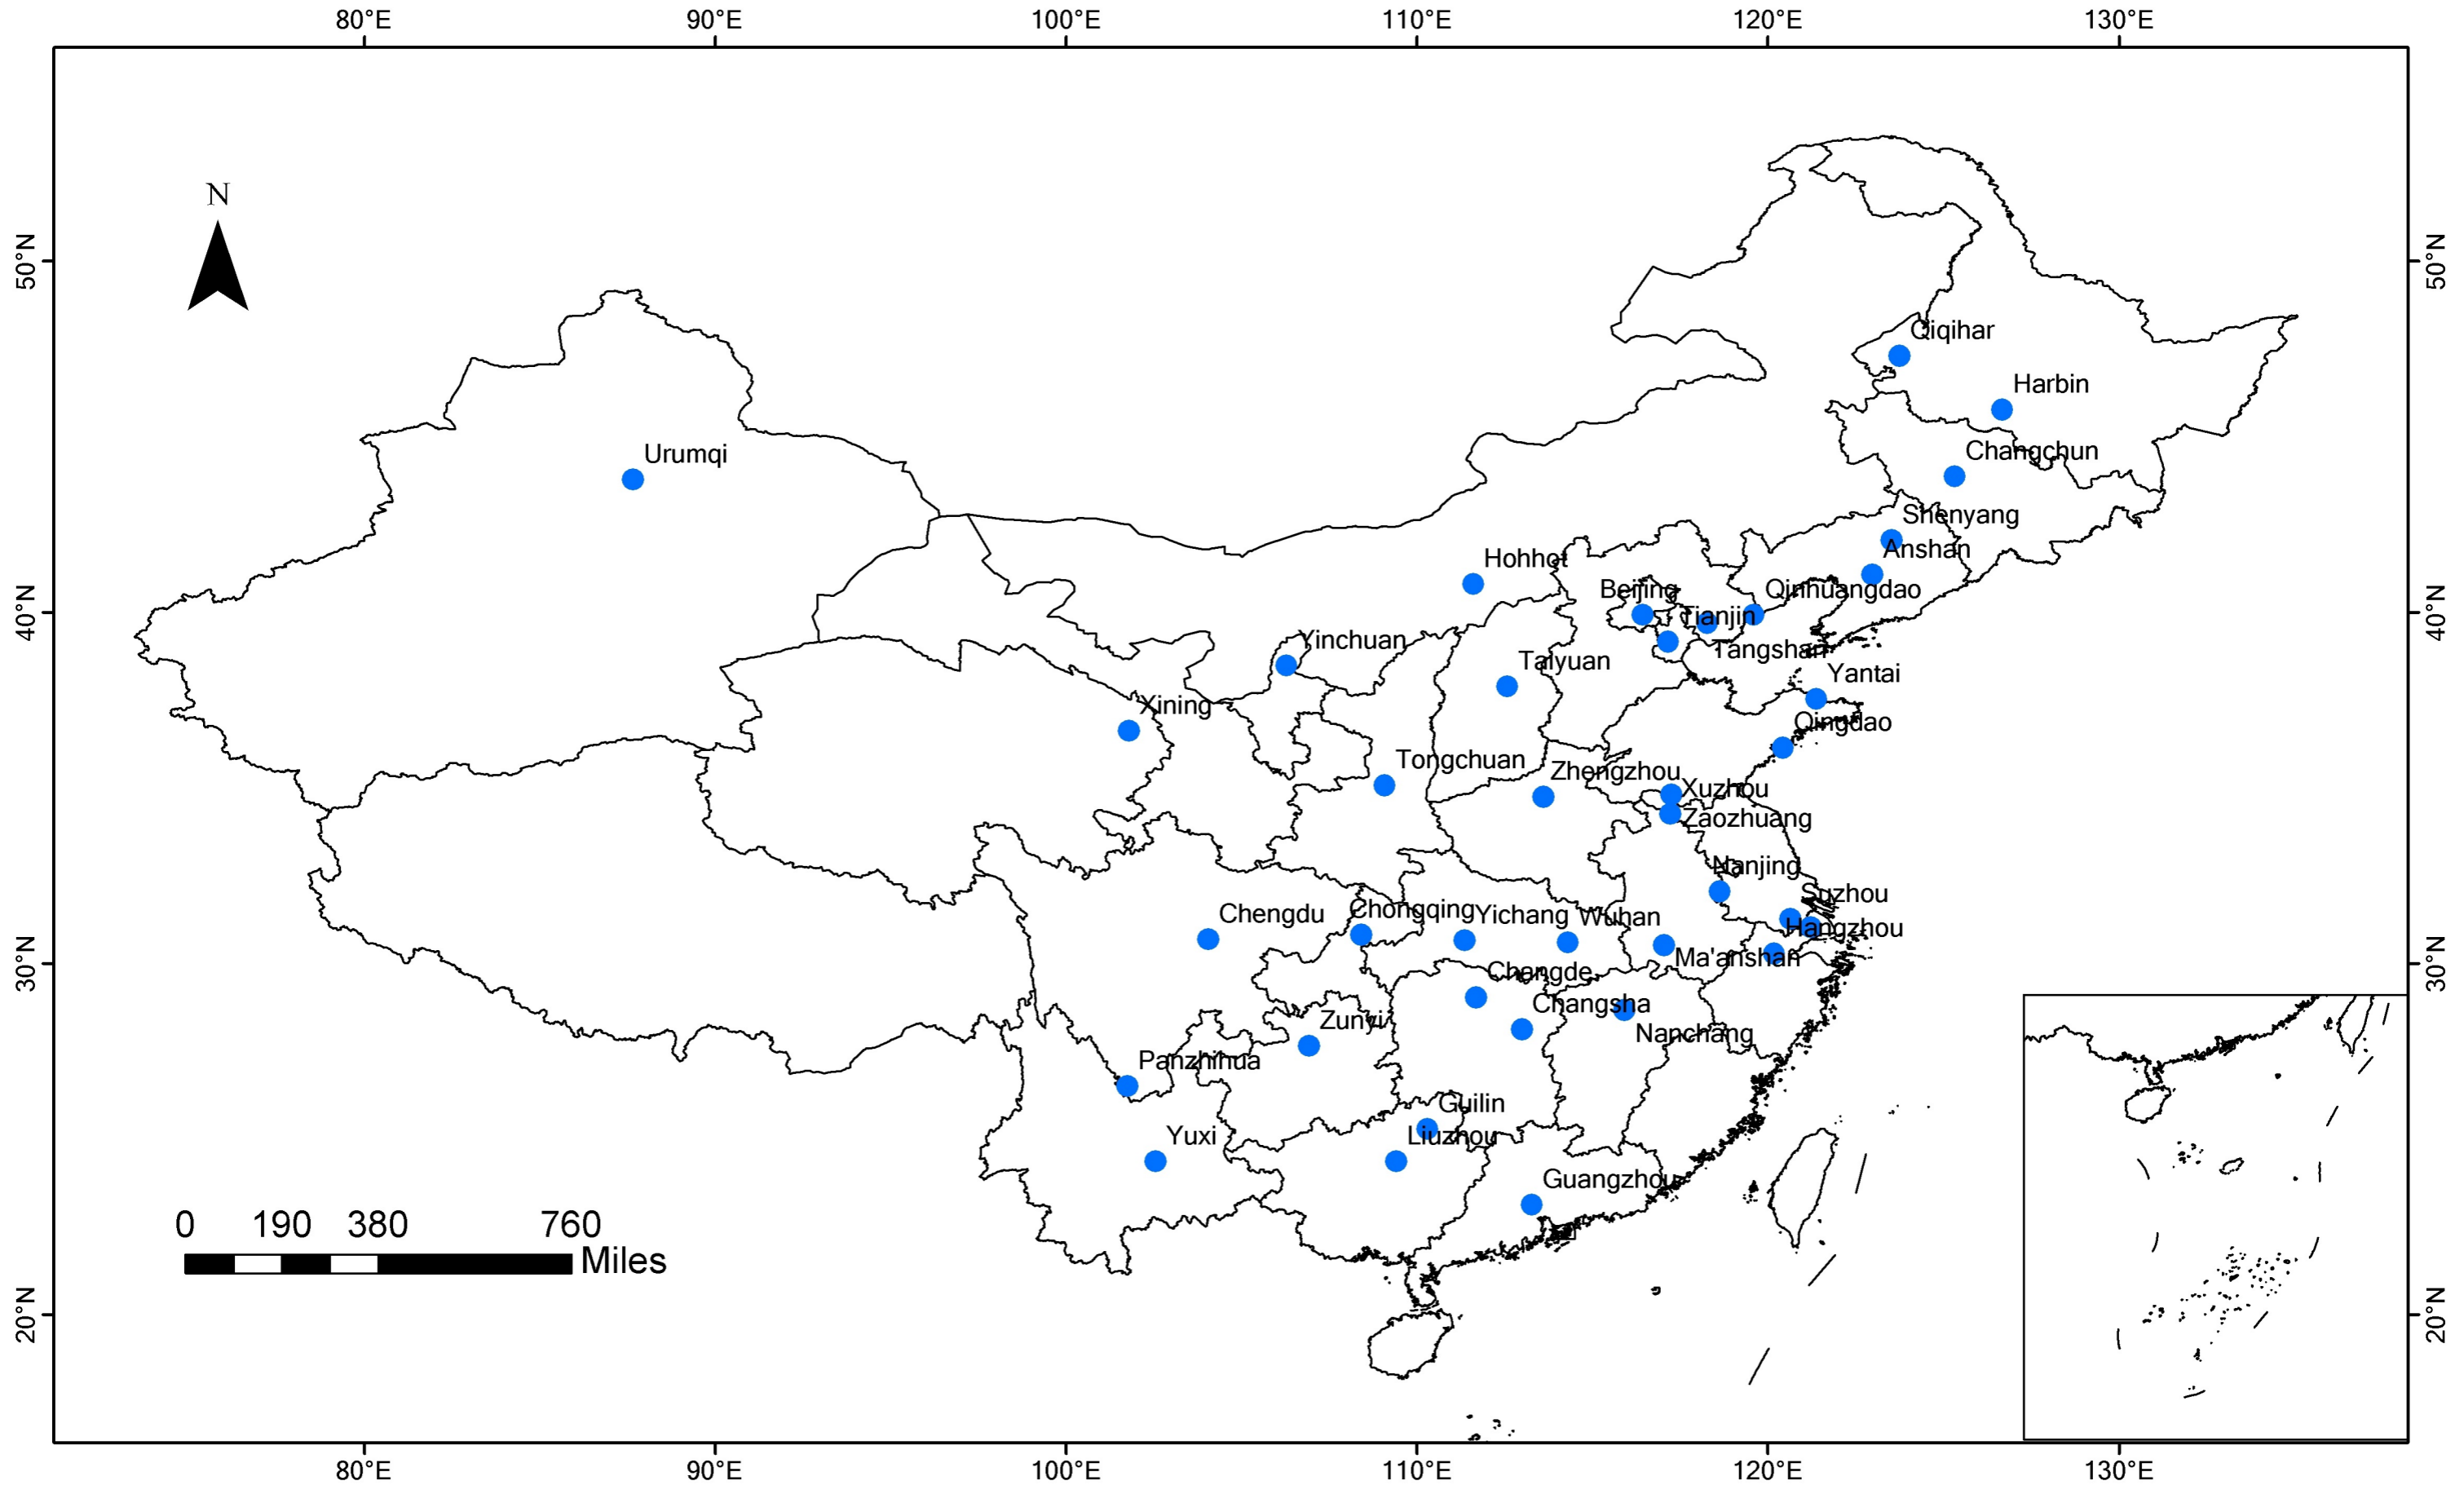

Supplement: peny033574.wf1.pdf [file peny033574.wf1.pdf]
